# Supplementary material for: Inequalities in Income and Education Are Associated With Survival Differences After Out-of-Hospital Cardiac Arrest: Nationwide Observational Study
Source: PubMed Central journal article supplement — Circulation. 2021 Nov 12;144(24):1915–25. doi: 10.1161/CIRCULATIONAHA.121.056012 (PMC8663522; doi:10.1161/circulationaha.121.056012), 2021-11-12
Supplement: cir-144-1915-s001.pdf [file cir-144-1915-s001.pdf]

## SUPPLEMENTAL MATERIAL

### Supplemental Tables

Supplemental table I. Modified Poisson regression (Model 3). EMS-witnessed cases (n=5115)

| term                | RR    | 95% CI, lower limit | 95% CI, upper limit | P-Value |
|---------------------|-------|---------------------|---------------------|---------|
| Education           |       |                     |                     |         |
| Primary (ref)       | 1.000 |                     |                     |         |
| Secondary           | 0.998 | 0.889               | 1.120               | 0.96689 |
| Post-secondary <=2y | 1.155 | 0.956               | 1.394               | 0.13453 |
| Post-secondary 3y   | 0.976 | 0.759               | 1.255               | 0.84844 |
| Post-secondary >=4y | 1.105 | 0.861               | 1.420               | 0.43239 |
| Income              |       |                     |                     |         |
| Q1 (ref)            | 1     |                     |                     |         |
| Q2                  | 0.998 | 0.830               | 1.199               | 0.97923 |
| Q3                  | 0.901 | 0.746               | 1.088               | 0.28043 |
| Q4                  | 1.092 | 0.922               | 1.293               | 0.30872 |
| Q5                  | 1.229 | 1.045               | 1.444               | 0.01243 |
| splines(Age, df=4)1 | 1.011 | 0.641               | 1.595               | 0.96076 |
| splines(Age, df=4)2 | 0.507 | 0.322               | 0.796               | 0.00321 |
| splines(Age, df=4)3 | 0.464 | 0.168               | 1.286               | 0.13981 |
| splines(Age, df=4)4 | 0.103 | 0.037               | 0.289               | 0.00002 |
| Female sex          | 0.802 | 0.710               | 0.905               | 0.00036 |
| Unmarried           | 0.842 | 0.725               | 0.977               | 0.02350 |
| Divorced            | 0.967 | 0.841               | 1.111               | 0.63689 |
| Widowed             | 0.869 | 0.698               | 1.082               | 0.20838 |
| YEAR                | 1.013 | 0.989               | 1.037               | 0.29201 |
| Retired             | 0.976 | 0.779               | 1.222               | 0.83105 |
| CCI score           | 0.894 | 0.865               | 0.924               | 0.00000 |

Supplemental table II. Baseline characteristics by educational level.

| Educational level     | 1 Primary    | 2 Secondary  | 3 Post-secondary <=2y | 4 Post-secondary 3y | 5 Post-secondary >=4y | SMD   | Missing |
|-----------------------|--------------|--------------|-----------------------|---------------------|-----------------------|-------|---------|
| n                     | 13210        | 12841        | 2444                  | 1464                | 1414                  |       |         |
| Age (median [IQR])    | 75 [65, 84]  | 70 [59, 79]  | 69 [59, 78]           | 70 [60, 80]         | 71 [62, 81]           | 0.172 | 0.0     |
| Female Sex            | 4564 (34.5)  | 4052 (31.6)  | 732 (30.0)            | 477 (32.6)          | 331 (23.4)            | 0.110 | 0.0     |
| Civil status          |              |              |                       |                     |                       |       |         |
| Married               | 6462 (49.2)  | 6343 (49.6)  | 1352 (56.1)           | 813 (56.1)          | 878 (62.8)            | 0.136 | 0.5     |
| Unmarried             | 2689 (20.5)  | 2905 (22.7)  | 476 (19.7)            | 289 (19.9)          | 208 (14.9)            | 0.084 | 0.5     |
| Divorced              | 1900 (14.5)  | 2303 (18.0)  | 402 (16.7)            | 207 (14.3)          | 207 (14.8)            | 0.053 | 0.5     |
| Widow/widowed         | 2095 (15.9)  | 1246 (9.7)   | 182 (7.5)             | 141 (9.7)           | 106 (7.6)             | 0.121 | 0.5     |
| Retired               | 9996 (75.7)  | 8120 (63.2)  | 1494 (61.1)           | 951 (65.0)          | 949 (67.1)            | 0.143 | 0.0     |
| Year                  |              |              |                       |                     |                       | 0.062 | 0.0     |
| 2010                  | 1445 (10.9)  | 1344 (10.5)  | 238 (9.7)             | 150 (10.2)          | 153 (10.8)            |       |         |
| 2011                  | 1605 (12.1)  | 1475 (11.5)  | 294 (12.0)            | 167 (11.4)          | 157 (11.1)            |       |         |
| 2012                  | 1666 (12.6)  | 1459 (11.4)  | 271 (11.1)            | 186 (12.7)          | 149 (10.5)            |       |         |
| 2013                  | 1678 (12.7)  | 1597 (12.4)  | 311 (12.7)            | 184 (12.6)          | 180 (12.7)            |       |         |
| 2014                  | 1657 (12.5)  | 1633 (12.7)  | 310 (12.7)            | 176 (12.0)          | 188 (13.3)            |       |         |
| 2015                  | 1707 (12.9)  | 1746 (13.6)  | 321 (13.1)            | 208 (14.2)          | 186 (13.2)            |       |         |
| 2016                  | 1705 (12.9)  | 1771 (13.8)  | 339 (13.9)            | 201 (13.7)          | 201 (14.2)            |       |         |
| 2017                  | 1747 (13.2)  | 1816 (14.1)  | 360 (14.7)            | 192 (13.1)          | 200 (14.1)            |       |         |
| Time, call - arrival  | 10 [6, 15]   | 9 [6, 15]    | 9 [6, 15]             | 9 [6, 14]           | 9 [6, 14]             | 0.038 | 4.7     |
| Time, collapse - call | 3 [1, 6]     | 2 [1, 6]     | 2 [1, 6]              | 2 [1, 6]            | 2 [1, 6]              | 0.017 | 32.4    |
| Public location       | 3206 (24.3)  | 3526 (27.5)  | 729 (29.9)            | 433 (29.6)          | 438 (31.0)            | 0.071 | 0.0     |
| Witnessed OHCA        | 8065 (62.4)  | 7539 (60.0)  | 1475 (61.8)           | 905 (63.3)          | 887 (63.8)            | 0.038 | 2.1     |
| Cardiac cause         | 10836 (85.7) | 10347 (84.1) | 1994 (84.6)           | 1193 (85.0)         | 1159 (85.5)           | 0.023 | 4.1     |
| Shockable rhythm      | 2697 (20.9)  | 2896 (23.1)  | 617 (25.9)            | 362 (25.3)          | 386 (27.9)            | 0.079 | 2.2     |
| Bystander CPR         | 7615 (57.7)  | 7631 (59.4)  | 1466 (60.0)           | 892 (60.9)          | 892 (63.1)            | 0.051 | 0.0     |
| First responder CPR   | 3165 (28.9)  | 2943 (27.3)  | 582 (28.1)            | 323 (25.8)          | 300 (25.1)            | 0.044 | 16.3    |
| CCI                   |              |              |                       |                     |                       | 0.087 | 0.0     |
| 0-1                   | 7057 (53.4)  | 7359 (57.3)  | 1462 (59.8)           | 884 (60.4)          | 796 (56.3)            |       |         |
| 2-3                   | 5124 (38.8)  | 4482 (34.9)  | 779 (31.9)            | 465 (31.8)          | 514 (36.4)            |       |         |
| 4-6                   | 753 (5.7)    | 743 (5.8)    | 138 (5.6)             | 86 (5.9)            | 73 (5.2)              |       |         |
| 7-15                  | 276 (2.1)    | 257 (2.0)    | 65 (2.7)              | 29 (2.0)            | 31 (2.2)              |       |         |
| Alive day 1           | 2506 (19.0)  | 2877 (22.4)  | 614 (25.1)            | 373 (25.5)          | 363 (25.7)            | 0.079 | 0.0     |
| Alive day 30          | 945 (7.2)    | 1154 (9.0)   | 301 (12.3)            | 171 (11.7)          | 185 (13.1)            | 0.101 | 0.0     |
| Alive 1 year          | 830 (6.3)    | 1052 (8.2)   | 276 (11.3)            | 160 (10.9)          | 159 (11.2)            | 0.092 | 0.0     |

## Full regression models

Supplemental table III. Income model 1

| term             | Beta    | Standard error | df      | P-value | RR    | 95% CI, lower limit | 95% CI, upper limit |
|------------------|---------|----------------|---------|---------|-------|---------------------|---------------------|
| Income Q1        | ref     |                |         |         | ref   |                     |                     |
| Income Q2        | 0.0795  | 0.0718         | 31351.8 | 0.2683  | 1.083 | 0.941               | 1.246               |
| Income Q3        | 0.1976  | 0.0684         | 31351.7 | 0.0039  | 1.218 | 1.066               | 1.393               |
| Income Q4        | 0.4143  | 0.0617         | 31344.4 | 0.0000  | 1.513 | 1.341               | 1.708               |
| Income Q5        | 0.6319  | 0.0589         | 31321.6 | 0.0000  | 1.881 | 1.676               | 2.111               |
| ns(Age, df = 4)1 | -0.7096 | 0.1228         | 31087.0 | 0.0000  | 0.492 | 0.387               | 0.626               |
| ns(Age, df = 4)2 | -1.3380 | 0.1754         | 31300.2 | 0.0000  | 0.262 | 0.186               | 0.370               |
| ns(Age, df = 4)3 | -2.7967 | 0.3450         | 31285.6 | 0.0000  | 0.061 | 0.031               | 0.120               |
| ns(Age, df = 4)4 | -4.2385 | 0.6111         | 31351.1 | 0.0000  | 0.014 | 0.004               | 0.048               |
| Female sex       | -0.3834 | 0.0447         | 31342.8 | 0.0000  | 0.682 | 0.624               | 0.744               |
| Unmarried        | -0.1499 | 0.0525         | 23023.6 | 0.0043  | 0.861 | 0.777               | 0.954               |
| Divorced         | -0.0906 | 0.0553         | 29295.7 | 0.1014  | 0.913 | 0.820               | 1.018               |
| Widow            | 0.2563  | 0.0803         | 29618.4 | 0.0014  | 1.292 | 1.104               | 1.512               |
| Year             | 0.0215  | 0.0078         | 31351.2 | 0.0060  | 1.022 | 1.006               | 1.038               |
| Retirement       | 0.0281  | 0.0829         | 31351.8 | 0.7350  | 1.028 | 0.874               | 1.210               |

df = degrees of freedom after Barnard-Rubin correction.

Supplemental table IV. Income model 2

| term             | Beta    | Standard error | df      | P-value | RR    | 95% CI, lower limit | 95% CI, upper limit |
|------------------|---------|----------------|---------|---------|-------|---------------------|---------------------|
| Income Q1        | ref     |                |         |         | ref   |                     |                     |
| Income Q2        | 0.0847  | 0.0717         | 31348.8 | 0.2373  | 1.088 | 0.946               | 1.253               |
| Income Q3        | 0.2123  | 0.0684         | 31348.4 | 0.0019  | 1.237 | 1.081               | 1.414               |
| Income Q4        | 0.4361  | 0.0616         | 31340.4 | 0.0000  | 1.547 | 1.371               | 1.745               |
| Income Q5        | 0.6645  | 0.0589         | 31318.2 | 0.0000  | 1.944 | 1.732               | 2.182               |
| ns(Age, df = 4)1 | -0.7647 | 0.1233         | 31097.8 | 0.0000  | 0.465 | 0.366               | 0.593               |
| ns(Age, df = 4)2 | -1.4442 | 0.1763         | 31297.7 | 0.0000  | 0.236 | 0.167               | 0.333               |
| ns(Age, df = 4)3 | -2.9377 | 0.3453         | 31280.9 | 0.0000  | 0.053 | 0.027               | 0.104               |
| ns(Age, df = 4)4 | -4.3835 | 0.6115         | 31348.1 | 0.0000  | 0.012 | 0.004               | 0.041               |
| Female sex       | -0.3591 | 0.0447         | 31339.1 | 0.0000  | 0.698 | 0.640               | 0.762               |
| Unmarried        | -0.1516 | 0.0526         | 23273.3 | 0.0040  | 0.859 | 0.775               | 0.953               |
| Divorced         | -0.0915 | 0.0552         | 28980.8 | 0.0971  | 0.913 | 0.819               | 1.017               |
| Widow            | 0.2601  | 0.0801         | 29711.4 | 0.0012  | 1.297 | 1.109               | 1.518               |
| Year             | 0.0216  | 0.0078         | 31348.3 | 0.0058  | 1.022 | 1.006               | 1.038               |
| Retirement       | 0.0213  | 0.0826         | 31348.8 | 0.7967  | 1.022 | 0.869               | 1.201               |
| CCI 2-3          | 0.3657  | 0.0382         | 31348.8 | 0.0000  | 1.442 | 1.338               | 1.554               |
| CCI 4-6          | -0.4492 | 0.1122         | 31348.8 | 0.0001  | 0.638 | 0.512               | 0.795               |
| CCI >7           | -0.4637 | 0.1799         | 31348.8 | 0.0100  | 0.629 | 0.442               | 0.895               |

df = degrees of freedom after Barnard-Rubin correction.

Supplemental table V. Income model 3 (same as education model 3)

| term                | Beta    | Standard error | df      | P-value | RR    | 95% CI, lower limit | 95% CI, upper limit |
|---------------------|---------|----------------|---------|---------|-------|---------------------|---------------------|
| Income Q1           | ref     |                |         |         | ref   |                     |                     |
| Income Q2           | 0.0894  | 0.0717         | 31344.8 | 0.2126  | 1.093 | 0.950               | 1.258               |
| Income Q3           | 0.2098  | 0.0683         | 31344.7 | 0.0021  | 1.233 | 1.079               | 1.410               |
| Income Q4           | 0.4184  | 0.0619         | 31337.2 | 0.0000  | 1.520 | 1.346               | 1.716               |
| Income Q5           | 0.6193  | 0.0598         | 31318.3 | 0.0000  | 1.858 | 1.652               | 2.089               |
| ns(Age, df = 4)1    | -0.7542 | 0.1231         | 31102.9 | 0.0000  | 0.470 | 0.370               | 0.599               |
| ns(Age, df = 4)2    | -1.4523 | 0.1761         | 31293.7 | 0.0000  | 0.234 | 0.166               | 0.331               |
| ns(Age, df = 4)3    | -2.9251 | 0.3450         | 31279.6 | 0.0000  | 0.054 | 0.027               | 0.106               |
| ns(Age, df = 4)4    | -4.3595 | 0.6105         | 31344.0 | 0.0000  | 0.013 | 0.004               | 0.042               |
| Female sex          | -0.3602 | 0.0447         | 31336.1 | 0.0000  | 0.698 | 0.639               | 0.761               |
| Unmarried           | -0.1431 | 0.0524         | 23421.6 | 0.0063  | 0.867 | 0.782               | 0.960               |
| Divorced            | -0.0905 | 0.0551         | 28770.3 | 0.1004  | 0.913 | 0.820               | 1.018               |
| Widow               | 0.2680  | 0.0801         | 29615.2 | 0.0008  | 1.307 | 1.117               | 1.530               |
| Year                | 0.0204  | 0.0078         | 31344.1 | 0.0093  | 1.021 | 1.005               | 1.036               |
| Retirement          | 0.0211  | 0.0826         | 31344.8 | 0.7984  | 1.021 | 0.869               | 1.201               |
| CCI 2-3             | 0.3683  | 0.0382         | 31344.8 | 0.0000  | 1.445 | 1.341               | 1.558               |
| CCI 4-6             | -0.4470 | 0.1122         | 31344.8 | 0.0001  | 0.640 | 0.513               | 0.797               |
| CCI >7              | -0.4722 | 0.1798         | 31344.8 | 0.0086  | 0.624 | 0.438               | 0.887               |
| Primary education   | ref     |                |         |         | ref   |                     |                     |
| Secondary education | -0.0129 | 0.0421         | 31344.8 | 0.7601  | 0.987 | 0.909               | 1.072               |
| Post-secondary 2y   | 0.2277  | 0.0616         | 31344.8 | 0.0002  | 1.256 | 1.113               | 1.417               |
| Post-secondary 3y   | 0.1964  | 0.0770         | 31344.8 | 0.0107  | 1.217 | 1.047               | 1.415               |
| Post-secondary 4y   | 0.2561  | 0.0747         | 31344.8 | 0.0006  | 1.292 | 1.116               | 1.496               |

df = degrees of freedom after Barnard-Rubin correction.

Supplemental table VI. Income model 4 (same as education model 4)

| term                      | Beta    | Standard error | df      | P-value | RR    | 95% CI, lower limit | 95% CI, upper limit |
|---------------------------|---------|----------------|---------|---------|-------|---------------------|---------------------|
| Income Q1                 | ref     |                |         |         | ref   |                     |                     |
| Income Q2                 | 0.0165  | 0.0687         | 30785.7 | 0.8095  | 1.017 | 0.889               | 1.163               |
| Income Q3                 | 0.1389  | 0.0653         | 30806.1 | 0.0336  | 1.149 | 1.011               | 1.306               |
| Income Q4                 | 0.2902  | 0.0584         | 30092.4 | 0.0000  | 1.337 | 1.192               | 1.499               |
| Income Q5                 | 0.4430  | 0.0571         | 30807.9 | 0.0000  | 1.557 | 1.392               | 1.742               |
| ns(Age, df = 4)1          | -1.0603 | 0.1162         | 30168.5 | 0.0000  | 0.346 | 0.276               | 0.435               |
| ns(Age, df = 4)2          | -1.7079 | 0.1676         | 31279.0 | 0.0000  | 0.181 | 0.131               | 0.252               |
| ns(Age, df = 4)3          | -3.7539 | 0.3362         | 30347.6 | 0.0000  | 0.023 | 0.012               | 0.045               |
| ns(Age, df = 4)4          | -4.2167 | 0.5903         | 31252.5 | 0.0000  | 0.015 | 0.005               | 0.047               |
| Female sex                | -0.1456 | 0.0435         | 28901.3 | 0.0008  | 0.865 | 0.794               | 0.941               |
| Unmarried                 | -0.1827 | 0.0481         | 17693.2 | 0.0001  | 0.833 | 0.758               | 0.915               |
| Divorced                  | -0.1282 | 0.0512         | 24956.6 | 0.0124  | 0.880 | 0.796               | 0.973               |
| Widow                     | 0.1278  | 0.0778         | 25164.1 | 0.1005  | 1.136 | 0.976               | 1.323               |
| Year                      | 0.0271  | 0.0075         | 30831.4 | 0.0003  | 1.027 | 1.013               | 1.043               |
| Retirement                | 0.0507  | 0.0768         | 31051.6 | 0.5088  | 1.052 | 0.905               | 1.223               |
| CCI 2-3                   | 0.3503  | 0.0359         | 30977.4 | 0.0000  | 1.419 | 1.323               | 1.523               |
| CCI 4-6                   | -0.2837 | 0.1100         | 31325.0 | 0.0099  | 0.753 | 0.607               | 0.934               |
| CCI >7                    | -0.3356 | 0.1718         | 31313.0 | 0.0508  | 0.715 | 0.510               | 1.001               |
| Primary education         | ref     |                |         |         | ref   |                     |                     |
| Secondary education       | -0.0112 | 0.0400         | 31179.5 | 0.7796  | 0.989 | 0.914               | 1.070               |
| Post-secondary 2y         | 0.1636  | 0.0582         | 30624.9 | 0.0050  | 1.178 | 1.051               | 1.320               |
| Post-secondary 3y         | 0.1076  | 0.0713         | 30616.4 | 0.1310  | 1.114 | 0.968               | 1.281               |
| Post-secondary 4y         | 0.1322  | 0.0706         | 29461.2 | 0.0611  | 1.141 | 0.994               | 1.311               |
| ns(call_arrival, df = 4)1 | -0.9640 | 0.0877         | 15605.1 | 0.0000  | 0.381 | 0.321               | 0.453               |
| ns(call_arrival, df = 4)2 | -1.5671 | 0.1663         | 1502.8  | 0.0000  | 0.209 | 0.151               | 0.289               |
| ns(call_arrival, df = 4)3 | -1.6706 | 0.2399         | 12944.0 | 0.0000  | 0.188 | 0.118               | 0.301               |
| ns(call_arrival, df = 4)4 | -0.7086 | 0.3045         | 3472.1  | 0.0200  | 0.492 | 0.271               | 0.894               |
| witnessed                 | 1.2365  | 0.0537         | 14176.0 | 0.0000  | 3.444 | 3.099               | 3.826               |
| public                    | 0.8541  | 0.0371         | 25896.6 | 0.0000  | 2.349 | 2.184               | 2.526               |
| cardiac                   | 0.3760  | 0.0600         | 2132.5  | 0.0000  | 1.456 | 1.295               | 1.638               |
| FirstRCPR                 | 0.1870  | 0.0451         | 2088.4  | 0.0000  | 1.206 | 1.103               | 1.317               |
| ByCPR                     | 0.4475  | 0.0422         | 29180.8 | 0.0000  | 1.564 | 1.440               | 1.699               |

df = degrees of freedom after Barnard-Rubin correction.

Supplemental table VII. Income model 5 (same as education model 5)

| term                      | Beta    | Standard error | df      | P-value | RR    | 95% CI, lower limit | 95% CI, upper limit |
|---------------------------|---------|----------------|---------|---------|-------|---------------------|---------------------|
| Income Q1                 | ref     |                |         |         | ref   |                     |                     |
| Income Q2                 | 0.0130  | 0.0660         | 22931.3 | 0.8442  | 1.013 | 0.890               | 1.153               |
| Income Q3                 | 0.0774  | 0.0621         | 24273.9 | 0.2124  | 1.080 | 0.957               | 1.220               |
| Income Q4                 | 0.1671  | 0.0563         | 12455.7 | 0.0030  | 1.182 | 1.058               | 1.320               |
| Income Q5                 | 0.2951  | 0.0543         | 26930.6 | 0.0000  | 1.343 | 1.208               | 1.494               |
| ns(Age, df = 4)1          | -0.9665 | 0.1107         | 13608.1 | 0.0000  | 0.380 | 0.306               | 0.473               |
| ns(Age, df = 4)2          | -1.4716 | 0.1583         | 29796.9 | 0.0000  | 0.230 | 0.168               | 0.313               |
| ns(Age, df = 4)3          | -3.2954 | 0.3170         | 20937.5 | 0.0000  | 0.037 | 0.020               | 0.069               |
| ns(Age, df = 4)4          | -3.2089 | 0.5451         | 31092.6 | 0.0000  | 0.040 | 0.014               | 0.118               |
| Female sex                | 0.0955  | 0.0416         | 22650.7 | 0.0217  | 1.100 | 1.014               | 1.194               |
| Unmarried                 | -0.1122 | 0.0445         | 22120.6 | 0.0118  | 0.894 | 0.819               | 0.975               |
| Divorced                  | -0.0913 | 0.0493         | 16995.2 | 0.0639  | 0.913 | 0.829               | 1.005               |
| Widow                     | 0.1036  | 0.0736         | 23038.3 | 0.1592  | 1.109 | 0.960               | 1.281               |
| Year                      | 0.0403  | 0.0072         | 27509.6 | 0.0000  | 1.041 | 1.027               | 1.056               |
| Retirement                | 0.0180  | 0.0716         | 29328.7 | 0.8011  | 1.018 | 0.885               | 1.172               |
| CCI 2-3                   | 0.2812  | 0.0343         | 25279.2 | 0.0000  | 1.325 | 1.238               | 1.417               |
| CCI 4-6                   | -0.1185 | 0.1068         | 30920.7 | 0.2672  | 0.888 | 0.720               | 1.095               |
| CCI >7                    | -0.2240 | 0.1661         | 31203.6 | 0.1775  | 0.799 | 0.577               | 1.107               |
| Primary education         | ref     |                |         |         | ref   |                     |                     |
| Secondary education       | -0.0175 | 0.0382         | 30513.4 | 0.6464  | 0.983 | 0.912               | 1.059               |
| Post-secondary 2y         | 0.1462  | 0.0549         | 28623.2 | 0.0077  | 1.157 | 1.039               | 1.289               |
| Post-secondary 3y         | 0.0759  | 0.0674         | 28901.0 | 0.2598  | 1.079 | 0.945               | 1.231               |
| Post-secondary 4y         | 0.0953  | 0.0677         | 29957.1 | 0.1590  | 1.100 | 0.963               | 1.256               |
| ns(call_arrival, df = 4)1 | -0.7541 | 0.0829         | 13686.9 | 0.0000  | 0.470 | 0.400               | 0.553               |
| ns(call_arrival, df = 4)2 | -1.1247 | 0.1583         | 1009.5  | 0.0000  | 0.325 | 0.238               | 0.443               |
| ns(call_arrival, df = 4)3 | -1.0747 | 0.2282         | 8534.9  | 0.0000  | 0.341 | 0.218               | 0.534               |
| ns(call_arrival, df = 4)4 | -0.2090 | 0.2753         | 2440.8  | 0.4479  | 0.811 | 0.473               | 1.392               |
| witnessed                 | 0.8262  | 0.0537         | 12713.0 | 0.0000  | 2.285 | 2.056               | 2.538               |
| public                    | 0.6279  | 0.0356         | 27276.1 | 0.0000  | 1.874 | 1.747               | 2.009               |
| cardiac                   | -0.2221 | 0.0612         | 1948.7  | 0.0003  | 0.801 | 0.710               | 0.903               |
| FirstRCPR                 | 0.1452  | 0.0437         | 1247.4  | 0.0009  | 1.156 | 1.061               | 1.260               |
| ByCPR                     | 0.2454  | 0.0412         | 23132.1 | 0.0000  | 1.278 | 1.179               | 1.386               |
| Shockable rhythm          | 1.7497  | 0.0472         | 2593.6  | 0.0000  | 5.753 | 5.244               | 6.311               |

df = degrees of freedom after Barnard-Rubin correction.

Supplemental table VIII. Income model 6 (same as education model 6)

| term                      | Beta    | Standard error | df      | P-value | RR    | 95% CI, lower limit | 95% CI, upper limit |
|---------------------------|---------|----------------|---------|---------|-------|---------------------|---------------------|
| Income Q1                 | ref     |                |         |         | ref   |                     |                     |
| Income Q2                 | 0.0337  | 0.0709         | 21292.1 | 0.6344  | 1.034 | 0.900               | 1.188               |
| Income Q3                 | 0.0800  | 0.0676         | 24205.9 | 0.2366  | 1.083 | 0.949               | 1.237               |
| Income Q4                 | 0.1819  | 0.0607         | 15394.6 | 0.0028  | 1.199 | 1.065               | 1.351               |
| Income Q5                 | 0.3152  | 0.0587         | 26191.5 | 0.0000  | 1.371 | 1.222               | 1.538               |
| ns(Age, df = 4)1          | -0.9562 | 0.1180         | 12089.0 | 0.0000  | 0.384 | 0.305               | 0.484               |
| ns(Age, df = 4)2          | -1.4558 | 0.1619         | 25748.9 | 0.0000  | 0.233 | 0.170               | 0.320               |
| ns(Age, df = 4)3          | -3.1532 | 0.3016         | 16102.7 | 0.0000  | 0.043 | 0.024               | 0.077               |
| ns(Age, df = 4)4          | -2.9993 | 0.4818         | 27756.1 | 0.0000  | 0.050 | 0.019               | 0.128               |
| Female sex                | 0.0940  | 0.0445         | 22253.1 | 0.0348  | 1.099 | 1.007               | 1.199               |
| Unmarried                 | -0.1181 | 0.0472         | 25539.9 | 0.0124  | 0.889 | 0.810               | 0.975               |
| Divorced                  | -0.1242 | 0.0535         | 12706.7 | 0.0204  | 0.883 | 0.795               | 0.981               |
| Widow                     | 0.0788  | 0.0790         | 18637.3 | 0.3186  | 1.082 | 0.927               | 1.263               |
| Year                      | 0.0474  | 0.0078         | 25350.0 | 0.0000  | 1.049 | 1.033               | 1.065               |
| Retirement                | 0.0475  | 0.0756         | 26979.4 | 0.5296  | 1.049 | 0.904               | 1.216               |
| CCI 2-3                   | 0.2951  | 0.0367         | 21621.9 | 0.0000  | 1.343 | 1.250               | 1.444               |
| CCI 4-6                   | -0.1975 | 0.1184         | 27568.0 | 0.0953  | 0.821 | 0.651               | 1.035               |
| CCI >7                    | -0.2028 | 0.1696         | 27806.3 | 0.2316  | 0.816 | 0.586               | 1.138               |
| Primary education         | ref     |                |         |         | ref   |                     |                     |
| Secondary education       | -0.0215 | 0.0408         | 27592.3 | 0.5992  | 0.979 | 0.903               | 1.060               |
| Post-secondary 2y         | 0.1087  | 0.0580         | 25755.2 | 0.0607  | 1.115 | 0.995               | 1.249               |
| Post-secondary 3y         | 0.0423  | 0.0722         | 24717.4 | 0.5576  | 1.043 | 0.906               | 1.202               |
| Post-secondary 4y         | 0.0765  | 0.0709         | 26897.5 | 0.2805  | 1.080 | 0.939               | 1.241               |
| ns(call_arrival, df = 4)1 | -0.6477 | 0.0987         | 4667.7  | 0.0000  | 0.523 | 0.431               | 0.635               |
| ns(call_arrival, df = 4)2 | -1.0121 | 0.1733         | 2514.8  | 0.0000  | 0.363 | 0.259               | 0.511               |
| ns(call_arrival, df = 4)3 | -0.9800 | 0.2601         | 6434.5  | 0.0002  | 0.375 | 0.225               | 0.625               |
| ns(call_arrival, df = 4)4 | -0.2004 | 0.3122         | 2329.0  | 0.5209  | 0.818 | 0.444               | 1.509               |
| witnessed                 | 0.8178  | 0.0570         | 11992.4 | 0.0000  | 2.266 | 2.026               | 2.534               |
| public                    | 0.6161  | 0.0381         | 21239.0 | 0.0000  | 1.852 | 1.718               | 1.995               |
| cardiac                   | -0.2636 | 0.0638         | 2098.8  | 0.0000  | 0.768 | 0.678               | 0.871               |
| FirstRCPR                 | 0.1594  | 0.0454         | 1132.3  | 0.0005  | 1.173 | 1.073               | 1.282               |
| ByCPR                     | 0.2680  | 0.0444         | 21960.7 | 0.0000  | 1.307 | 1.198               | 1.426               |
| Shockable rhythm          | 1.7472  | 0.0507         | 1917.7  | 0.0000  | 5.738 | 5.195               | 6.338               |
| ns(distance2, df = 4)1    | -0.2912 | 0.0704         | 19628.4 | 0.0000  | 0.747 | 0.651               | 0.858               |
| ns(distance2, df = 4)2    | -0.3335 | 0.2528         | 24732.9 | 0.1871  | 0.716 | 0.437               | 1.176               |
| ns(distance2, df = 4)3    | -0.2926 | 0.4636         | 26450.2 | 0.5280  | 0.746 | 0.301               | 1.852               |
| ns(distance2, df = 4)4    | 0.1335  | 1.0187         | 27198.8 | 0.8957  | 1.143 | 0.155               | 8.416               |

df = degrees of freedom after Barnard-Rubin correction.

Supplemental table IX. Income model 7 (same as education model 7)

| term                      | Beta    | Standard error | df      | P-value | RR    | 95% CI, lower limit | 95% CI, upper limit |
|---------------------------|---------|----------------|---------|---------|-------|---------------------|---------------------|
| Income Q1                 | ref     |                |         |         | ref   |                     |                     |
| Income Q2                 | 0.0363  | 0.0708         | 21395.9 | 0.6087  | 1.037 | 0.902               | 1.191               |
| Income Q3                 | 0.0835  | 0.0677         | 23748.1 | 0.2176  | 1.087 | 0.952               | 1.241               |
| Income Q4                 | 0.1875  | 0.0610         | 14243.4 | 0.0021  | 1.206 | 1.070               | 1.359               |
| Income Q5                 | 0.3197  | 0.0592         | 25705.4 | 0.0000  | 1.377 | 1.226               | 1.546               |
| ns(Age, df = 4)1          | -0.9524 | 0.1181         | 12057.2 | 0.0000  | 0.386 | 0.306               | 0.486               |
| ns(Age, df = 4)2          | -1.4561 | 0.1619         | 25789.3 | 0.0000  | 0.233 | 0.170               | 0.320               |
| ns(Age, df = 4)3          | -3.1561 | 0.3020         | 16338.4 | 0.0000  | 0.043 | 0.024               | 0.077               |
| ns(Age, df = 4)4          | -3.0061 | 0.4823         | 27752.5 | 0.0000  | 0.049 | 0.019               | 0.127               |
| Female sex                | 0.0945  | 0.0445         | 22783.6 | 0.0338  | 1.099 | 1.007               | 1.199               |
| Unmarried                 | -0.1163 | 0.0474         | 25998.6 | 0.0141  | 0.890 | 0.811               | 0.977               |
| Divorced                  | -0.1258 | 0.0536         | 13677.4 | 0.0188  | 0.882 | 0.794               | 0.979               |
| Widow                     | 0.0805  | 0.0791         | 18886.3 | 0.3093  | 1.084 | 0.928               | 1.266               |
| Year                      | 0.0478  | 0.0078         | 25225.0 | 0.0000  | 1.049 | 1.033               | 1.065               |
| Retirement                | 0.0495  | 0.0756         | 26986.0 | 0.5125  | 1.051 | 0.906               | 1.218               |
| CCI 2-3                   | 0.2937  | 0.0368         | 21595.5 | 0.0000  | 1.341 | 1.248               | 1.442               |
| CCI 4-6                   | -0.2025 | 0.1185         | 27541.1 | 0.0874  | 0.817 | 0.647               | 1.030               |
| CCI >7                    | -0.2101 | 0.1697         | 27813.6 | 0.2157  | 0.810 | 0.581               | 1.130               |
| Primary education         | ref     |                |         |         | ref   |                     |                     |
| Secondary education       | -0.0195 | 0.0408         | 27581.4 | 0.6325  | 0.981 | 0.905               | 1.062               |
| Post-secondary 2y         | 0.1087  | 0.0579         | 25693.2 | 0.0606  | 1.115 | 0.995               | 1.249               |
| Post-secondary 3y         | 0.0403  | 0.0722         | 24486.5 | 0.5762  | 1.041 | 0.904               | 1.199               |
| Post-secondary 4y         | 0.0754  | 0.0710         | 26748.2 | 0.2883  | 1.078 | 0.938               | 1.239               |
| ns(call_arrival, df = 4)1 | -0.6393 | 0.0987         | 4824.2  | 0.0000  | 0.528 | 0.435               | 0.640               |
| ns(call_arrival, df = 4)2 | -0.9851 | 0.1738         | 2379.6  | 0.0000  | 0.373 | 0.266               | 0.525               |
| ns(call_arrival, df = 4)3 | -0.9703 | 0.2599         | 6420.6  | 0.0002  | 0.379 | 0.228               | 0.631               |
| ns(call_arrival, df = 4)4 | -0.2064 | 0.3118         | 2154.1  | 0.5082  | 0.814 | 0.441               | 1.500               |
| witnessed                 | 0.8179  | 0.0570         | 12057.4 | 0.0000  | 2.266 | 2.026               | 2.534               |
| public                    | 0.6146  | 0.0381         | 21572.0 | 0.0000  | 1.849 | 1.716               | 1.992               |
| cardiac                   | -0.2623 | 0.0637         | 2248.5  | 0.0000  | 0.769 | 0.679               | 0.872               |
| FirstRCPR                 | 0.1526  | 0.0458         | 1062.6  | 0.0009  | 1.165 | 1.065               | 1.274               |
| ByCPR                     | 0.2712  | 0.0443         | 22454.4 | 0.0000  | 1.312 | 1.202               | 1.431               |
| Shockable rhythm          | 1.7473  | 0.0507         | 1943.1  | 0.0000  | 5.739 | 5.196               | 6.339               |
| ns(distance2, df = 4)1    | -0.2798 | 0.0707         | 19458.9 | 0.0001  | 0.756 | 0.658               | 0.868               |
| ns(distance2, df = 4)2    | -0.3059 | 0.2507         | 24490.7 | 0.2224  | 0.736 | 0.451               | 1.204               |
| ns(distance2, df = 4)3    | -0.2457 | 0.4532         | 26420.2 | 0.5877  | 0.782 | 0.322               | 1.901               |
| ns(distance2, df = 4)4    | 0.1885  | 0.9903         | 27123.8 | 0.8491  | 1.207 | 0.173               | 8.412               |
| foreign Q2                | 0.1149  | 0.0740         | 26757.1 | 0.1206  | 1.122 | 0.970               | 1.297               |
| foreign Q3                | 0.1572  | 0.0735         | 27364.8 | 0.0325  | 1.170 | 1.013               | 1.352               |
| foreign Q4                | 0.1080  | 0.0744         | 26290.8 | 0.1470  | 1.114 | 0.963               | 1.289               |
| foreign Q5                | 0.1410  | 0.0759         | 24468.9 | 0.0633  | 1.151 | 0.992               | 1.336               |

df = degrees of freedom after Barnard-Rubin correction.



Supplemental table X. Education model 1

| term                | Beta    | Standard error | df      | P-value | RR    | 95% CI, lower limit | 95% CI, upper limit |
|---------------------|---------|----------------|---------|---------|-------|---------------------|---------------------|
| Primary education   | ref     |                |         |         | ref   |                     |                     |
| Secondary education | 0.0344  | 0.0421         | 31351.8 | 0.4148  | 1.035 | 0.953               | 1.124               |
| Post-secondary 2y   | 0.3096  | 0.0617         | 31351.8 | 0.0000  | 1.363 | 1.208               | 1.538               |
| Post-secondary 3y   | 0.3068  | 0.0760         | 31351.8 | 0.0001  | 1.359 | 1.171               | 1.577               |
| Post-secondary 4y   | 0.4113  | 0.0741         | 31351.8 | 0.0000  | 1.509 | 1.305               | 1.745               |
| ns(Age, df = 4)1    | -0.6139 | 0.1220         | 31099.8 | 0.0000  | 0.541 | 0.426               | 0.687               |
| ns(Age, df = 4)2    | -1.5504 | 0.1727         | 31314.1 | 0.0000  | 0.212 | 0.151               | 0.298               |
| ns(Age, df = 4)3    | -2.6451 | 0.3400         | 31289.9 | 0.0000  | 0.071 | 0.036               | 0.138               |
| ns(Age, df = 4)4    | -4.0807 | 0.5973         | 31350.9 | 0.0000  | 0.017 | 0.005               | 0.054               |
| Female sex          | -0.4359 | 0.0446         | 31346.3 | 0.0000  | 0.647 | 0.593               | 0.706               |
| Unmarried           | -0.2908 | 0.0499         | 23620.9 | 0.0000  | 0.748 | 0.678               | 0.824               |
| Divorced            | -0.2367 | 0.0537         | 29187.9 | 0.0000  | 0.789 | 0.710               | 0.877               |
| Widow               | 0.1845  | 0.0796         | 29371.3 | 0.0205  | 1.203 | 1.029               | 1.406               |
| Year                | 0.0222  | 0.0078         | 31350.6 | 0.0047  | 1.022 | 1.007               | 1.038               |
| retirement          | 0.0126  | 0.0842         | 31351.8 | 0.8810  | 1.013 | 0.859               | 1.194               |

df = degrees of freedom after Barnard-Rubin correction.

Supplemental table XI. Education model 2

| term                | Beta    | Standard error | df      | P-value | RR    | 95% CI, lower limit | 95% CI, upper limit |
|---------------------|---------|----------------|---------|---------|-------|---------------------|---------------------|
| Primary education   | ref     |                |         |         | ref   |                     |                     |
| Secondary education | 0.0375  | 0.0420         | 31348.8 | 0.3724  | 1.038 | 0.956               | 1.127               |
| Post-secondary 2y   | 0.3259  | 0.0615         | 31348.8 | 0.0000  | 1.385 | 1.228               | 1.563               |
| Post-secondary 3y   | 0.3250  | 0.0759         | 31348.8 | 0.0000  | 1.384 | 1.193               | 1.606               |
| Post-secondary 4y   | 0.4181  | 0.0740         | 31348.8 | 0.0000  | 1.519 | 1.314               | 1.756               |
| ns(Age, df = 4)1    | -0.6520 | 0.1223         | 31106.7 | 0.0000  | 0.521 | 0.410               | 0.662               |
| ns(Age, df = 4)2    | -1.6534 | 0.1735         | 31309.6 | 0.0000  | 0.191 | 0.136               | 0.269               |
| ns(Age, df = 4)3    | -2.7580 | 0.3399         | 31284.1 | 0.0000  | 0.063 | 0.033               | 0.123               |
| ns(Age, df = 4)4    | -4.1930 | 0.5961         | 31347.9 | 0.0000  | 0.015 | 0.005               | 0.049               |
| Female sex          | -0.4152 | 0.0446         | 31342.8 | 0.0000  | 0.660 | 0.605               | 0.721               |
| Unmarried           | -0.3015 | 0.0498         | 23738.1 | 0.0000  | 0.740 | 0.671               | 0.816               |
| Divorced            | -0.2463 | 0.0536         | 28777.7 | 0.0000  | 0.782 | 0.704               | 0.868               |
| Widow               | 0.1821  | 0.0794         | 29511.7 | 0.0219  | 1.200 | 1.027               | 1.402               |
| Year                | 0.0226  | 0.0079         | 31347.4 | 0.0041  | 1.023 | 1.007               | 1.039               |
| retirement          | 0.0064  | 0.0839         | 31348.8 | 0.9394  | 1.006 | 0.854               | 1.186               |
| CCI 2-3             | 0.3369  | 0.0380         | 31348.8 | 0.0000  | 1.401 | 1.300               | 1.509               |
| CCI 4-6             | -0.4663 | 0.1122         | 31348.8 | 0.0000  | 0.627 | 0.503               | 0.782               |
| CCI >7              | -0.5038 | 0.1794         | 31348.8 | 0.0050  | 0.604 | 0.425               | 0.859               |

df = degrees of freedom after Barnard-Rubin correction.

## Complete case analyses

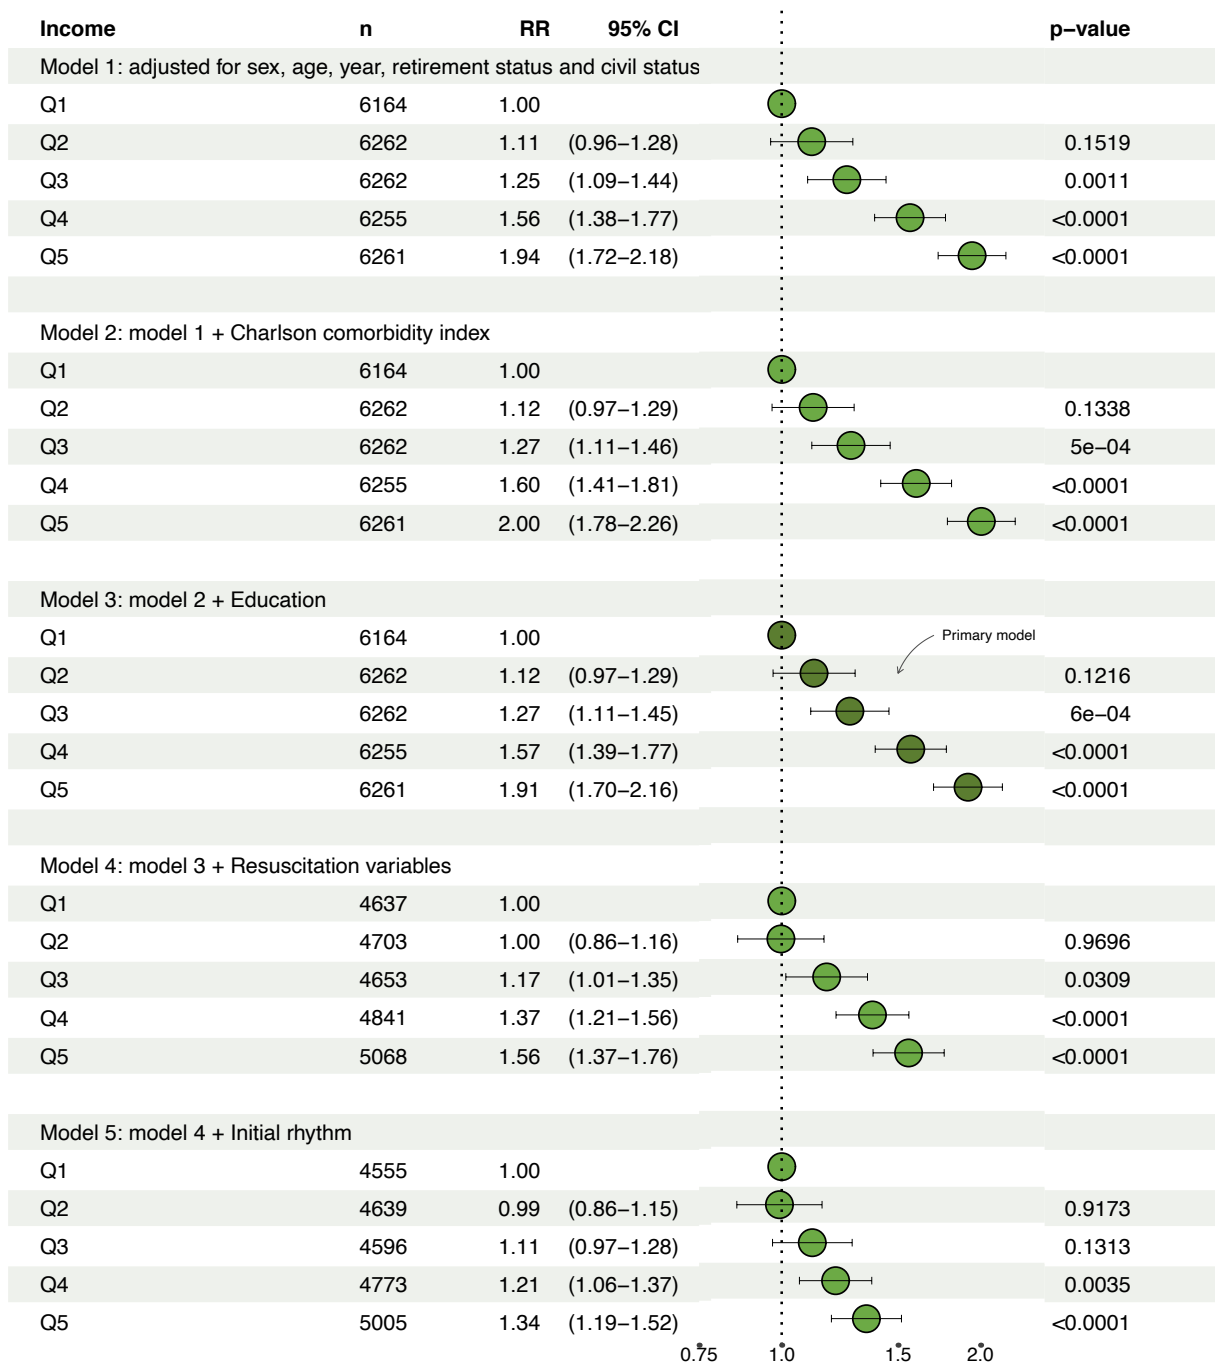

Supplemental figure I.

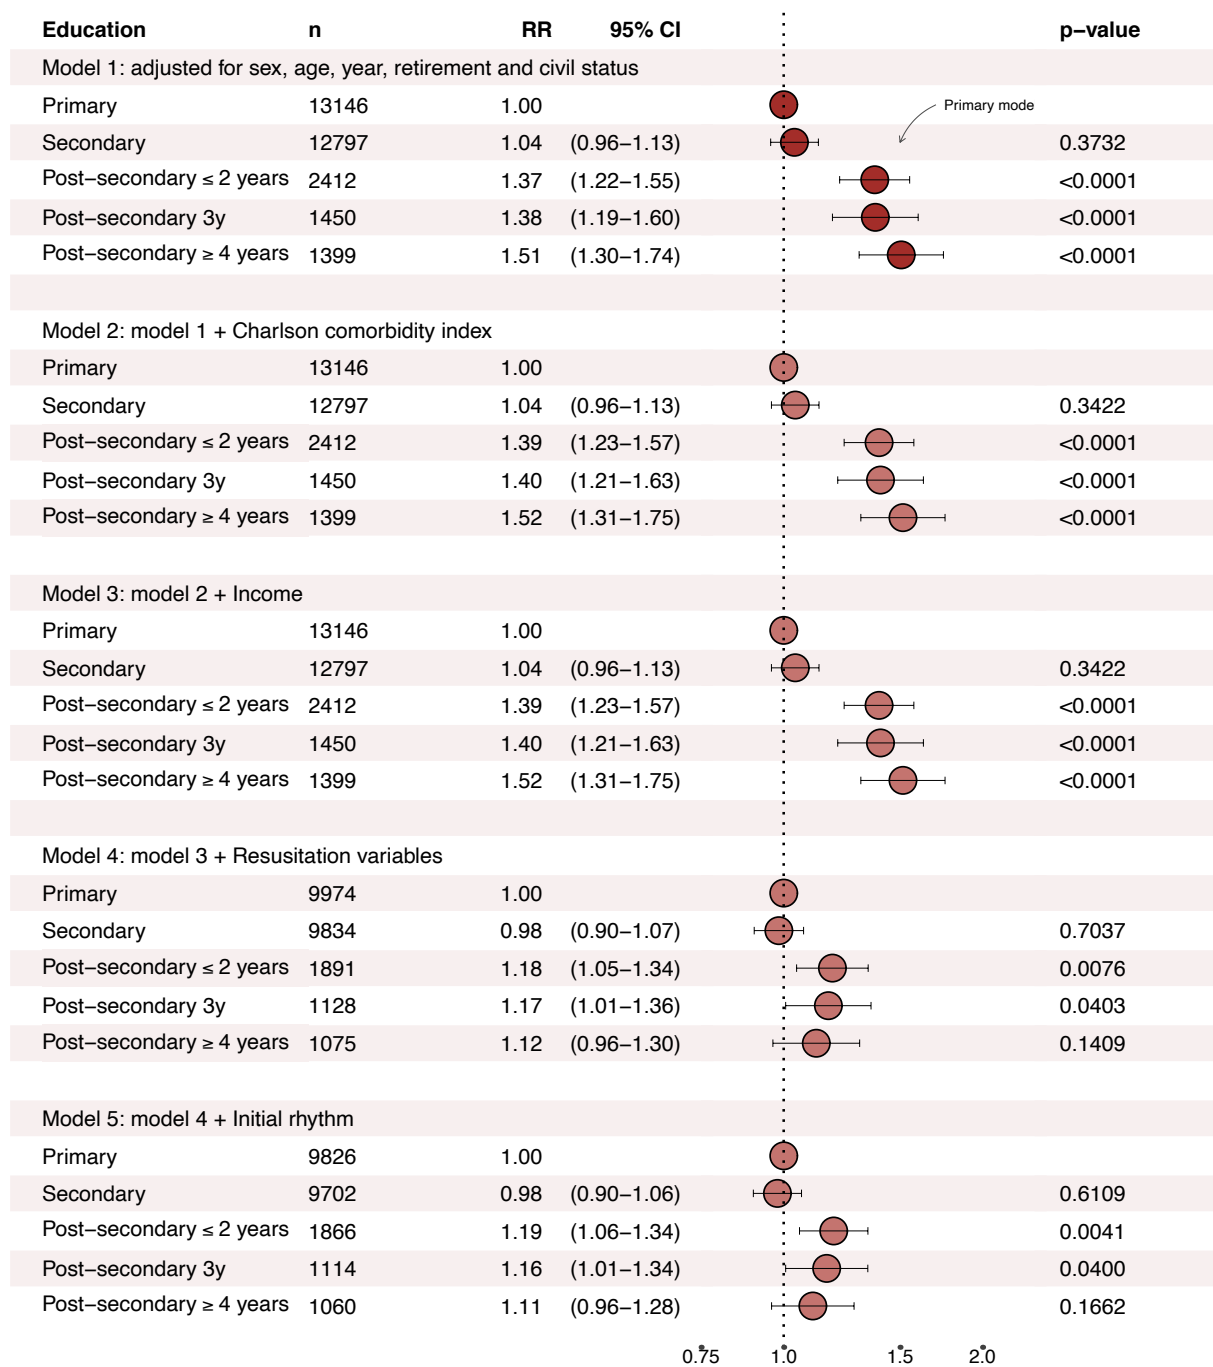

Supplemental figure II.

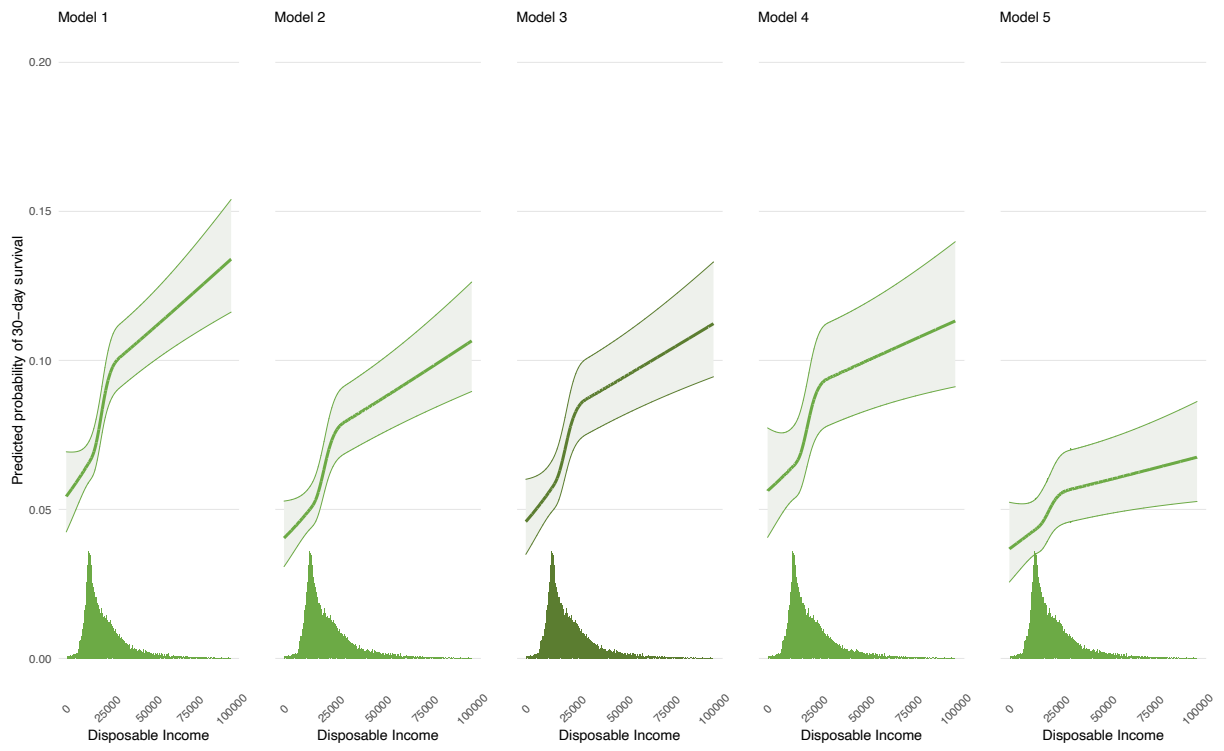

Supplemental figure III.

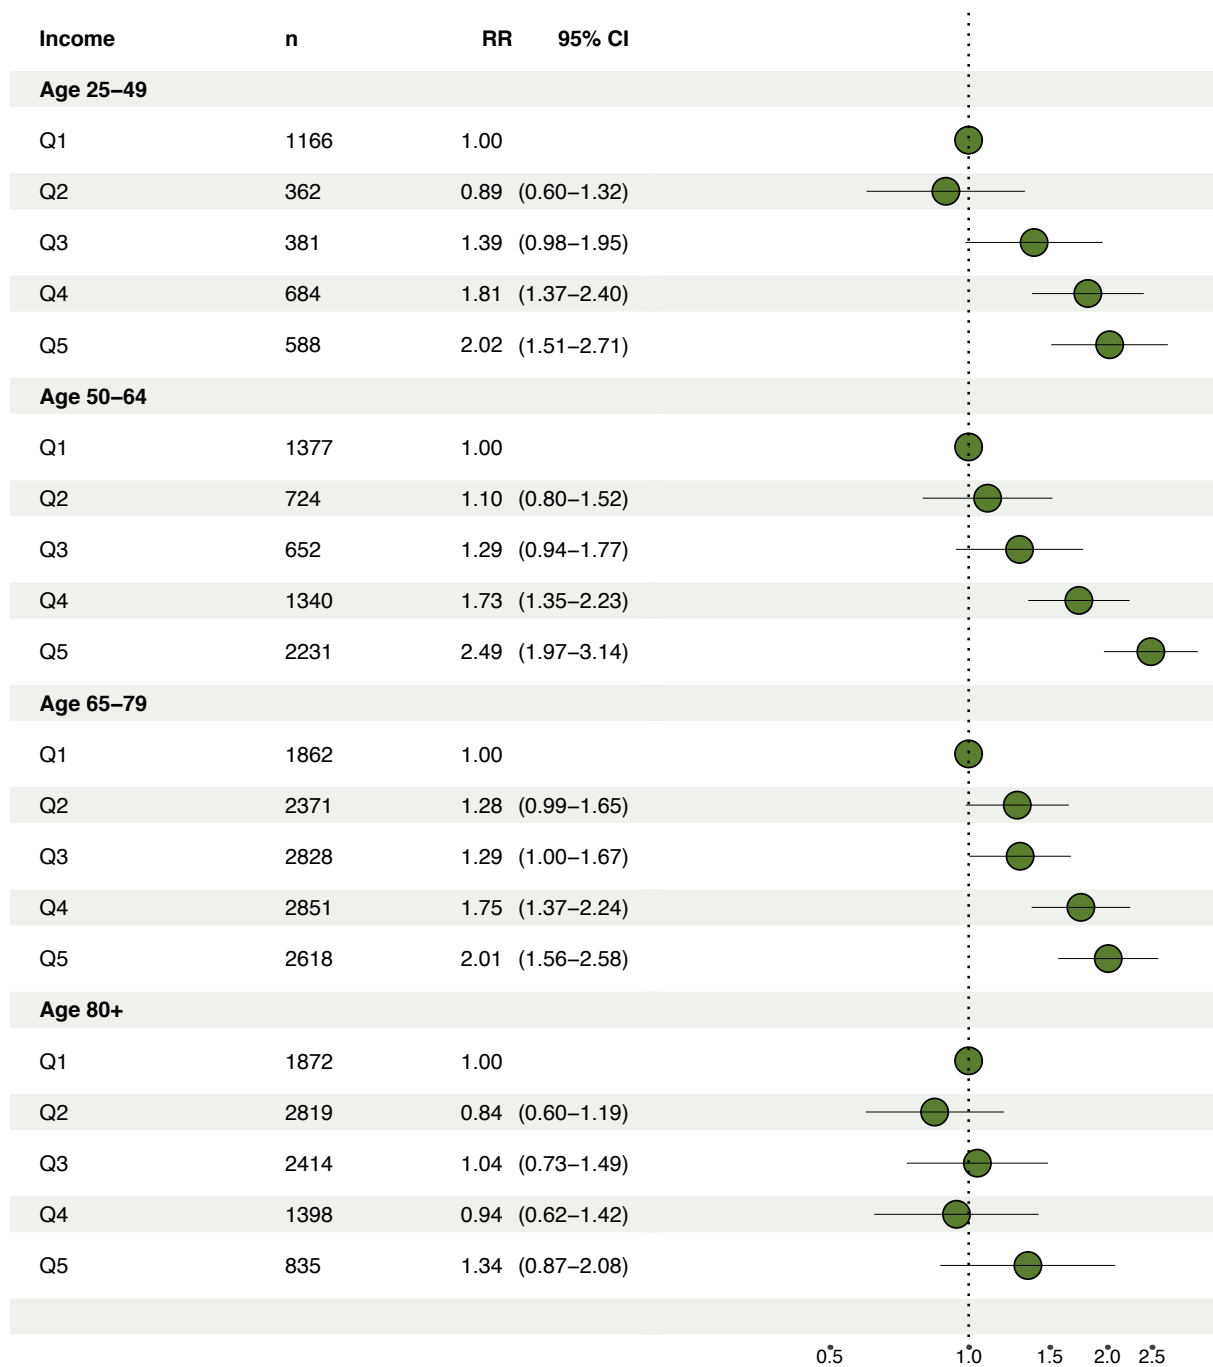

Supplemental figure IV.

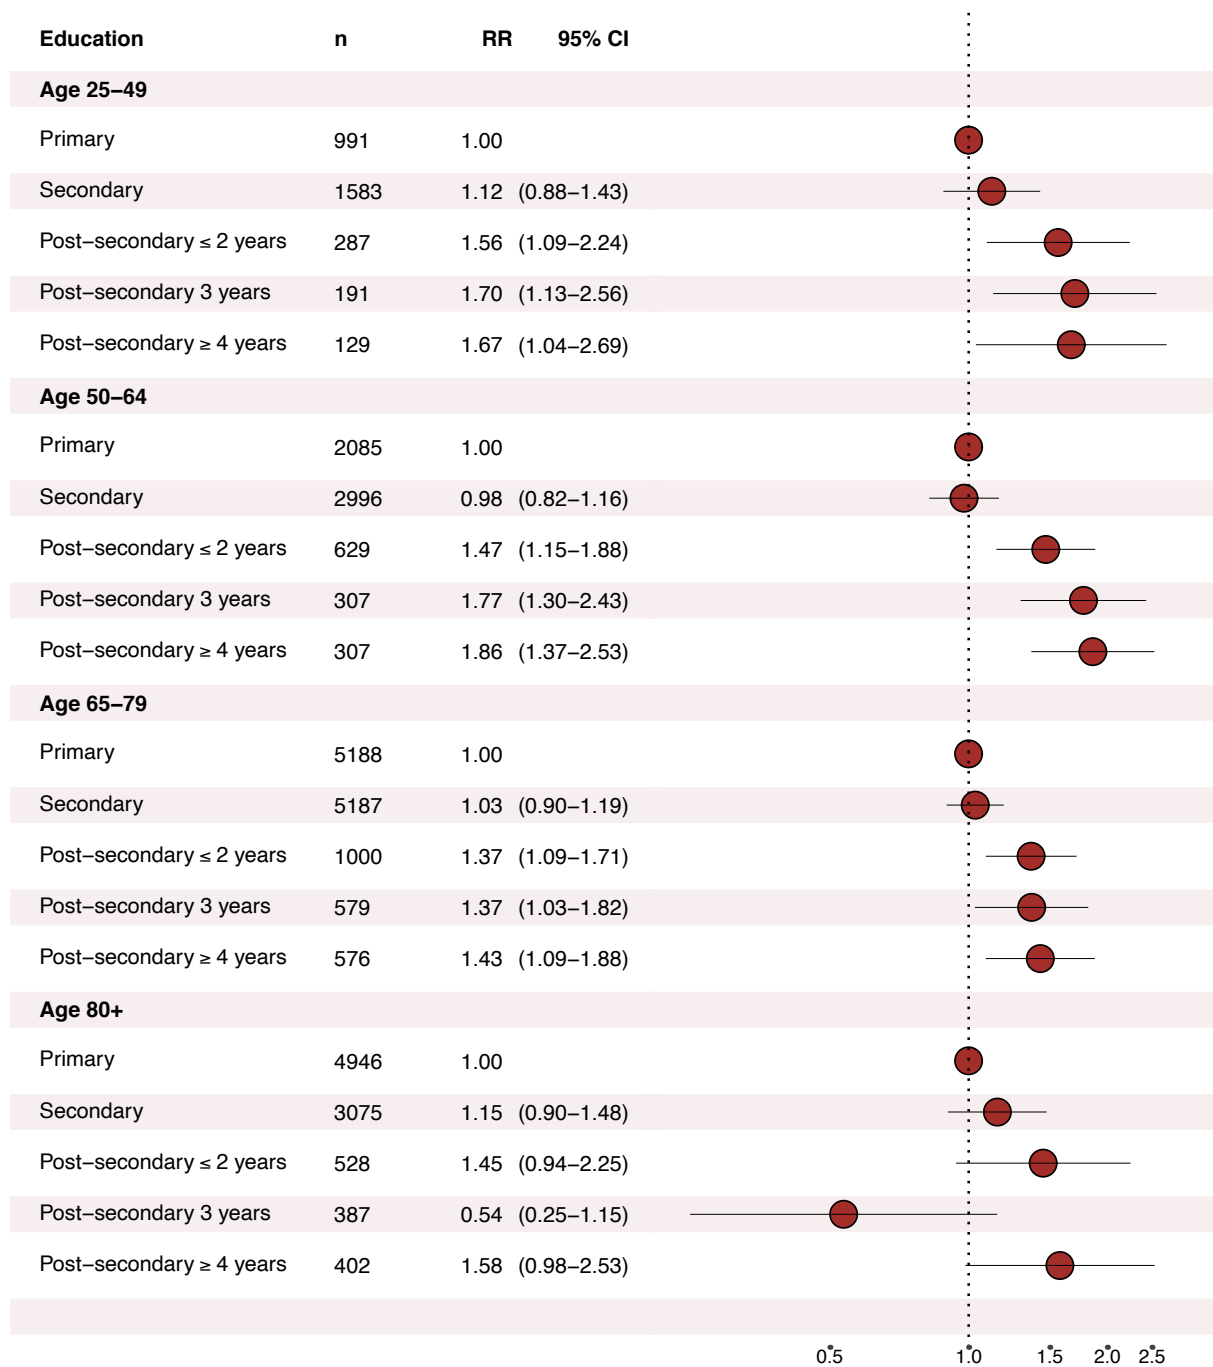

Supplemental figure V.

## Figure legends

Supplemental figure I. Complete case analyses by income quintile.

Supplemental figure II. Complete case analyses for educational level.

Supplemental figure III. Natural splines of disposable income and 30-day survival

Supplemental figure IV. Results from modified Poisson regression stratified by age for income quintiles.  
Adjustment for variables in model 3.

Supplemental figure V. Results from modified Poisson regression stratified by age for educational level.  
Adjustment for variables in model 1.
